# Supplementary material for: Tuning the structural asymmetries of three-dimensional gold nanorod assemblies
Source: Royal Society of Chemistry journal article supplement (doi:10.1039/c5cc05295e), 2015-01-01
Supplement: c5cc05295e1.pdf [file c5cc05295e1.pdf]

## Supporting information

# Tuning Structural Asymmetries of Three- Dimensional Gold Nanorod Assemblies

Chenqi Shen, Xiang Lan, Xuxing Lu, Weihai Ni and Qiangbin Wang\*

### Experimental Section

**Materials.** All the chemicals were commercially obtained. Tetrachloroauric acid ( $\text{HAuCl}_4$ ) was purchased from Alfa, cetyltrimethyl ammonium bromide (CTAB), sodium dodecylsulfate (SDS), silver nitrate, sodium borohydride ascorbic acid and alicyclic acid were supplied by Sigma. bis(psulfanatophenyl)phenyl-phosphine (BSPP) was bought from Strem Chemicals. Non-thiolated DNA sequences were bought from Invitrogen. Thiolated DNA sequences of HPLC grade were bought from Sangon Biotech.

### Preparation and functionalization of AuNRs.

*Synthesis of AuNRs:*  $10 \times 36$  nm AuNRs were synthesized following our published protocol.<sup>1</sup>  $20 \times 40$  nm AuNRs were prepared by a modified seed-mediated growth method under the assistance of aromatic molecules, as previously reported.<sup>2</sup>

*Functionalization of the AuNRs with thiolated DNA:* 1 mL of 0.95 nM AuNRs was mixed with 10  $\mu\text{L}$  of 500  $\mu\text{M}$  thiolated DNA in  $1 \times \text{TBE}$  buffer containing 0.01% SDS, and incubate the mixture at room temperature for several hours. 10  $\mu\text{L}$  of 5 M NaCl was added into the reaction solution for 10 times in 20 h. The DNA functionalized AuNRs were purified through 2% agarose gel electrophoresis in  $0.5 \times \text{TBE}$  running buffer.

### Assembly of AuNRs on rectangular DNA Origami and purification.

*Assembly of DNA Origami:* DNA Origami was obtained by annealing the single stranded M13mp18 with capturing strands and staple strands at a ratio of 1:10:10 from 94 °C to room temperature over 12 h. To avoid DNA Origami stacking, all of the side staples were left out. In

order to get rid of excess staple strands and capturing strands, the origami products were stained using SYBR-Green and purified by 1% agarose gel electrophoresis using 0.5×TAE-Mg<sup>2+</sup> (Tris, 20 mM; Acetic acid, 10 mM; EDTA, 1 mM; and Magnesium acetate, 6.25 mM; pH 8.0) as running buffer. The gel band of the DNA Origami was cut out under UV light and recovered by electroelution with dialysis membrane (8000–14000 MWCO).

*Immobilization of AuNRs on DNA Origami and purification:* The purified DNA Origami was mixed with DNA-functionalized AuNRs at the molar ratio of [DNA Origami]:[AuNR1]:[AuNR2]:[AuNR3] of 1:5:5:5. AuNR dimers and trimers were assembled by hybridizing DNA-modified AuNRs with capturing strands; the configuration of the AuNR dimers and trimers varied with the locations of the capturing strands on DNA Origami. The mixture of AuNRs and DNA Origami was annealed from 40°C to room temperature over 12 h. The assemblies were subjected to 1% agarose gel electrophoresis for 30 minutes at 100 V. In daylight, the desired band was cut out and recovered by electroelution with dialysis membrane (8000–14000 MWCO).

### **Characterization.**

The absorption spectra of the AuNRs and their assemblies were measured by using PE lambda-25 UV/Vis spectrometer. The CD spectra were collected on an Applied Photophysics Chirascan Plus Spectropolarimeter. The measurement was carried out at the wavelength range of 400–900nm at room temperature in a 1.0 cm length cell. All the AuNR assemblies were diluted to 200 μL in 0.5×TAE-Mg<sup>2+</sup>. The scanning speed is 100 nm/min. The baseline was corrected using 0.5×TAE-Mg<sup>2+</sup> buffer. A Tecnai G2 F20 S-Twin TEM (FEI, USA) was used for sample observation.

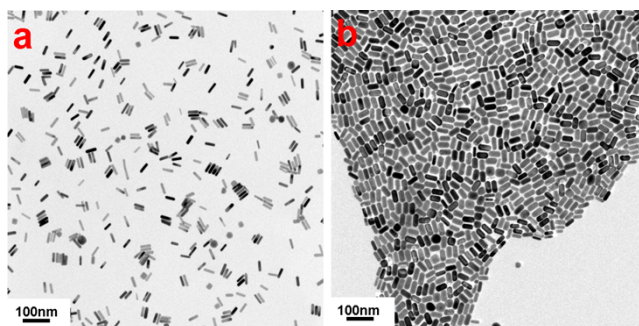

**Fig S1.** TEM images of (a) 10×36 nm AuNR and (b) 20×40 nm AuNR.

**Table S1.** Statistical sizes of 10×36 nm and 20×40 nm AuNR.

|              | Small AuNR | Big AuNR   |
|--------------|------------|------------|
| Length (nm)  | 36.43±2.47 | 40.03±1.96 |
| Width (nm)   | 9.88±1.37  | 19.97±2.02 |
| Aspect ratio | 3.69       | 2.00       |

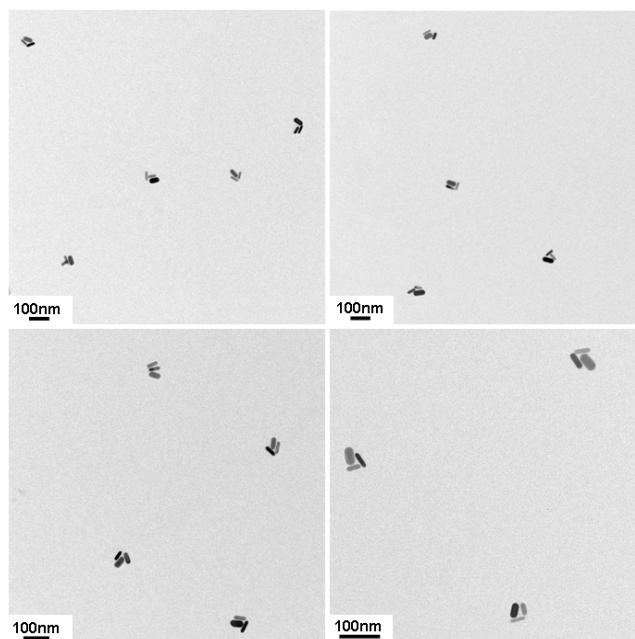

**Fig S2.** TEM images of trimer2.

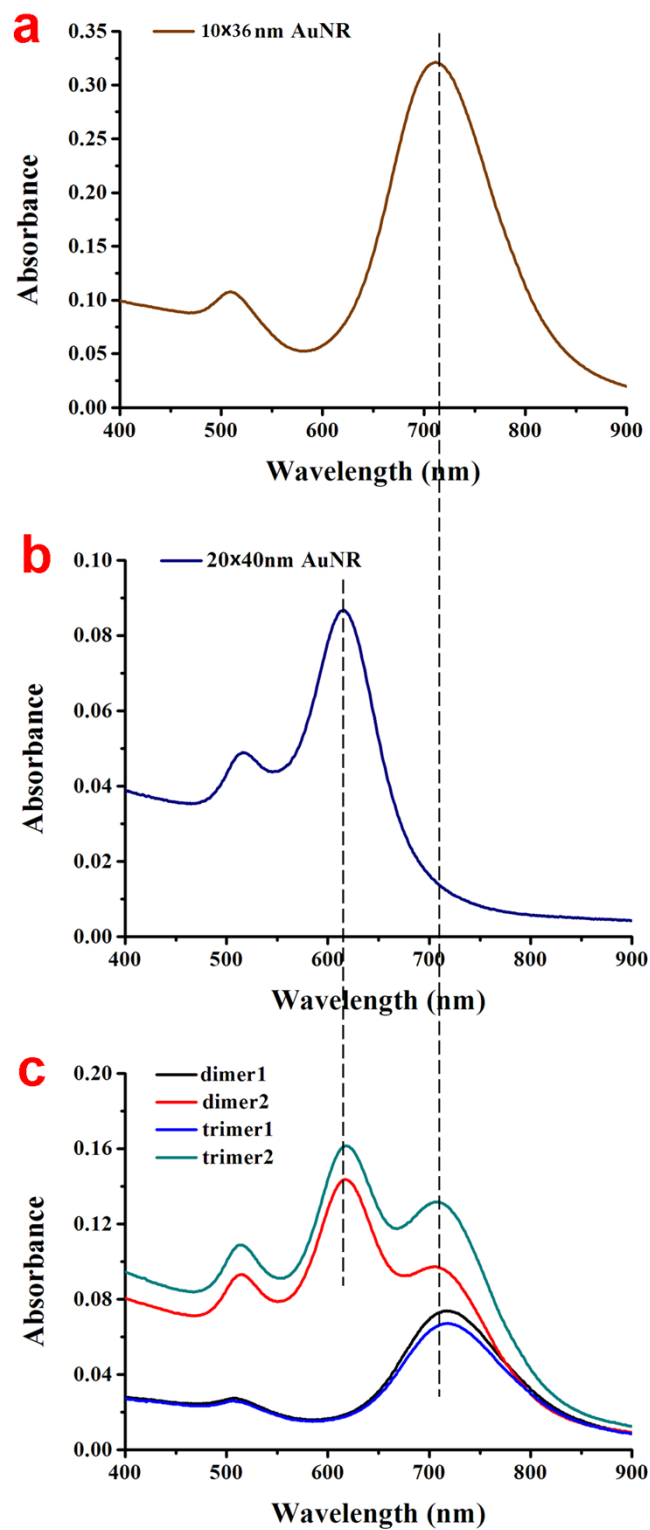

**Fig S3.** UV-vis absorption spectra of (a) 10×36 nm AuNR, (b) 20×40 nm AuNR and (c) assembled AuNR dimers and trimers.

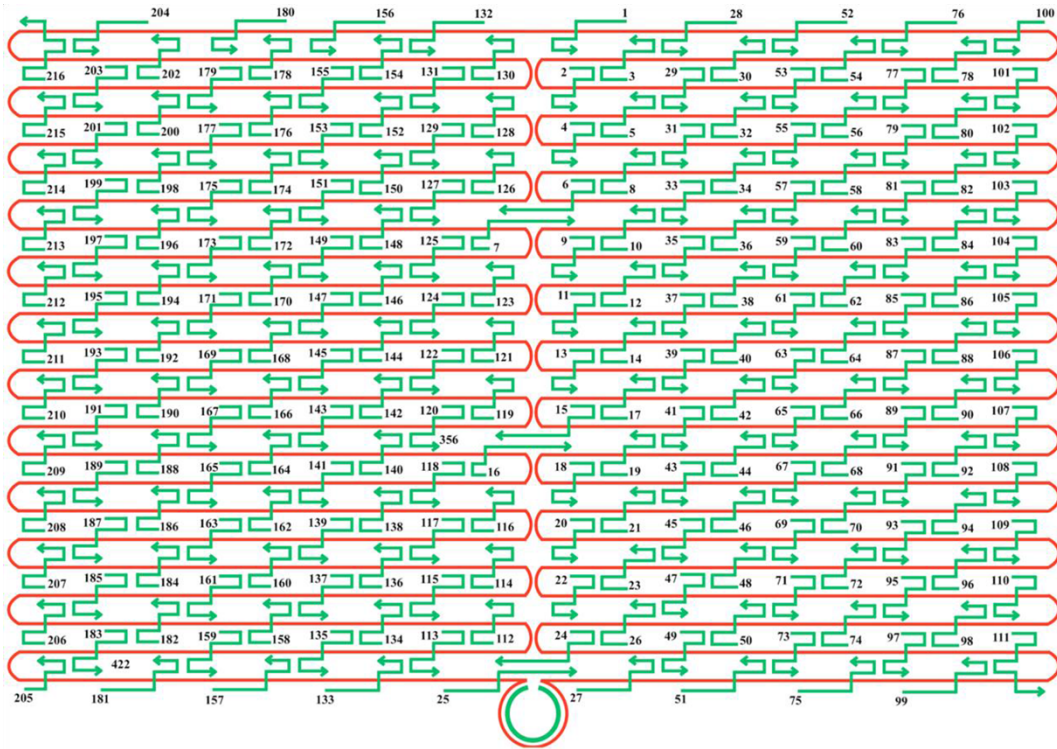

**Figure S4.** The basic rectangular DNA Origami used in present study without being modified with capturing strands on opposite sides. The green lines are short staple strands, the red line is single stranded M13mp18 viral DNA.

**Sequence of staple strands used in the assembly of basic rectangular DNA origami (left to right 5'-3')**

- 1 CAAGCCCAATAGGAAC CCATGTACAAACAGTT
- 2 AATGCCCCGTAACAGT GCCCGTATCTCCCTCA
- 3 TGCCTTGACTGCCTAT TTCGGAACAGGGATAG
- 4 GAGCCGCCCCACCACC GGAACCGCGACGGAAA
- 5 AACCAGAGACCCTCAG AACCGCCAGGGGTCAG
- 6 TTATTCATAGGGAAGG TAAATATT CATTCAAGT
- 7 CATAACCCGAGGCATA GTAAGAGC TTTTAAAG
- 8 ATTGAGGGTAAAGGTG AATTATCAATCACCGG
- 9 AAAAGTAATATCTTAC CGAAGCCCTTCCAGAG
- 10 GCAATAGCGCAGATAG CCGAACAATTCAACCG
- 11 CCTAATTTACGCTAAC GAGCGTCTAATCAATA
- 12 TCTTACCAGCCAGTTA CAAAATAAATGAAATA

13 ATCGGCTGCGAGCATG TAGAAACCTATCATAT  
14 CTAATTTATCTTTCCT TATCATTCATCCTGAA  
15 GCGTTATAGAAAAAGC CTGTTTAG AAGGCCGG  
16 GCTCATTTTCGCATTA AATTTTTG AGCTTAGA  
17 AATTACTACAAATTCT TACCAGTAATCCCATC  
18 TTAAGACGTTGAAAAC ATAGCGATAACAGTAC  
19 TAGAATCCCTGAGAAG AGTCAATAGGAATCAT  
20 CTTTTACACAGATGAA TATACAGTAAACAATT  
21 TTAAACGTTTCGGGAGA AACAATAATTTTCCT  
22 CGACAATAAGTATTA GACTTTACAATACCGA  
23 GGATTTAGCGTATTAA ATCCTTTGTTTTCAGG  
24 ACGAACCAAAACATCG CCATTAAA TGGTGGTT  
25 GAACGTGGCGAGAAAG GAAGGGAA CAAACTAT  
26 TAGCCCTACCAGCAGA AGATAAAAACATTTGA  
27 CGGCCTTGCTGGTAAT ATCCAGAACGAACTGA  
28 CTCAGAGCCACCACC TCATTTTCCTATTATT  
29 CTGAAACAGGTAATAA GTTTTAACCCCTCAGA  
30 AGTGTACTTGAAAGTA TTAAGAGGCCGCCACC  
31 GCCACCACTCTTTTCA TAATCAAACCGTCACC  
32 GTTTGCCACCTCAGAG CCGCCACCGATACAGG  
33 GACTTGAGAGACAAAA GGGCGACAAGTTACCA  
34 AGCGCCAACCATTTGG GAATTAGATTATTAGC  
35 GAAGGAAAATAAGAGC AAGAAACAACAGCCAT  
36 GCCCAATACCGAGGAA ACGCAATAGGTTTACC  
37 ATTATTTAACCCAGCT ACAATTTTCAAGAACG  
38 TATTTTGCTCCCAATC CAAATAAGTGAGTTAA  
39 GGTATTAAGAACAAGA AAAATAATTAAGCCA  
40 TAAGTCCTACCAAGTA CCGCACTCTTAGTTGC  
41 ACGCTCAAATAAGAA TAAACACCGTGAATTT  
42 AGGCGTTACAGTAGGG CTTAATTGACAATAGA

43 ATCAAAATCGTCGCTA TTAATTAACGGATTCG  
44 CTGTAAATCATAGGTC TGAGAGACGATAAATA  
45 CCTGATTGAAAGAAAT TGCGTAGACCCGAACG  
46 ACAGAAATCTTTGAAT ACCAAGTTCCTTGCTT  
47 TTATTAATGCCGTCAA TAGATAATCAGAGGTG  
48 AGATTAGATTTAAAAG TTTGAGTACACGTAAA  
49 AGGCGGTCATTAGTCT TTAATGCGCAATATTA  
50 GAATGGCTAGTATTAA CACCGCCTCAACTAAT  
51 CCGCCAGCCATTGCAA CAGGAAAAATATTTTT  
52 CCCTCAGAACCGCCAC CCTCAGAACTGAGACT  
53 CCTCAAGAATACATGG CTTTTGATAGAACCAC  
54 TAAGCGTCGAAGGATT AGGATTAGTACCGCCA  
55 CACCAGAGTTCGGTCA TAGCCCCCGCCAGCAA  
56 TCGGCATTCCGCCGCC AGCATTGACGTTCCAG  
57 AATCACCAAATAGAAA ATTCATATATAACGGA  
58 TCACAATCGTAGCACC ATTACCATCGTTTTCA  
59 ATACCCAAGATAACCC ACAAGAATAAACGATT  
60 ATCAGAGAAAGAACTG GCATGATTTTATTTTG  
61 TTTTGTTTAAGCCTTA AATCAAGAATCGAGAA  
62 AGGTTTTGAACGTCAA AAATGAAAGCGCTAAT  
63 CAAGCAAGACGCGCCT GTTTATCAAGAATCGC  
64 AATGCAGACCGTTTTT ATTTTCATCTTGCGGG  
65 CATATTTAGAAATACC GACCGTGTTACCTTTT  
66 AATGGTTTACAACGCC AACATGTAGTTCAGCT  
67 TAACCTCCATATGTGA GTGAATAAACAAAATC  
68 AAATCAATGGCTTAGG TTGGGTTACTAAATTT  
69 GCGCAGAGATATCAAA ATTATTTGACATTATC  
70 AACCTACCGCGAATTA TTCATTTCCAGTACAT  
71 ATTTTGCGTCTTTAGG AGCACTAAGCAACAGT  
72 CTAAAATAGAACAAAG AAACCACCAGGGTTAG

73 GCCACGCTATACGTGG CACAGACAACGCTCAT  
74 GCGTAAGAGAGAGCCA GCAGCAAAAAGGTTAT  
75 GGAAATACCTACATTT TGACGCTCACCTGAAA  
76 TATCACCGTACTCAGG AGGTTTAGCGGGGTTT  
77 TGCTCAGTCAGTCTCT GAATTTACCAGGAGGT  
78 GGAAAGCGACCAGGCG GATAAGTGAATAGGTG  
79 TGAGGCAGGCGTCAGA CTGTAGCGTAGCAAGG  
80 TGCCTTTAGTCAGACG ATTGGCCTGCCAGAAT  
81 CCGGAAACACACCACG GAATAAGTAAGACTCC  
82 ACGCAAAGGTCACCAA TGAAACCAATCAAGTT  
83 TTATTACGGTCAGAGG GTAATTGAATAGCAGC  
84 TGAACAAACAGTATGT TAGCAAACATAAAAGAA  
85 CTTTACAGTTAGCGAA CCTCCCGACGTAGGAA  
86 GAGGCGTTAGAGAATA ACATAAAAGAACACCC  
87 TCATTACCCGACAATA AACACATATTTAGGC  
88 CCAGACGAGCGCCCAA TAGCAAGCAAGAACGC  
89 AGAGGCATAATTTTCAT CTTCTGACTATAACTA  
90 TTTTAGTTTTTCGAGC CAGTAATAAATTCTGT  
91 TATGTAAACCTTTTTT AATGGAAAAATTACCT  
92 TTGAATTATGCTGATG CAAATCCACAAATATA  
93 GAGCAAAAACCTTCTGA ATAATGGAAGAAGGAG  
94 TGGATTATGAAGATGA TGAAACAAAATTCAT  
95 CGGAATTATTGAAAGG AATTGAGGTGAAAAAT  
96 ATCAACAGTCATCATA TTCCTGATTGATTGTT  
97 CTAAAGCAAGATAGAA CCCTTCTGAATCGTCT  
98 GCCAACAGTCACCTTG CTGAACCTGTTGGCAA  
99 GAAATGGATTATTTAC ATTGGCAGACATTCTG  
100 TTTT TATAAGTA TAGCCCGCCGTCGAG  
101 AGGGTTGA TTTT ATAAATCC TCATTAAATGATATTC  
102 ACAAACAA TTTT AATCAGTA GCGACAGATCGATAGC



103 AGCACCGT TTTT TAAAGGTG GCAACATAGTAGAAAA  
104 TACATACA TTTT GACGGGAG AATTAACACAGGGAA  
105 GCGCATT A TTTT GCTTATCC GGTATTCTAAATCAGA  
106 TATAGAAG TTTT CGACAAAA GGTAAGTAGAGAATA  
107 TAAAGTAC TTTT CGCGAGAA AACTTTTTATCGCAAG  
108 ACAAAGAA TTTT ATTAATTA CATTTAACACATCAAG  
109 AAAACAAA TTTT TTCATCAA TATAATCCTATCAGAT  
110 GATGGCAA TTTT AATCAATA TCTGGTCACAAATATC  
111 AAACCCTC TTTT ACCAGTAA TAAAAGGGATTCACCA GTCACACG TTTT  
112 CCGAAATCCGAAAATC CTGTTTGAAGCCGGAA  
113 CCAGCAGGGGCAAAT CCCTTATAAAGCCGGC  
114 GCATAAAGTTCCACAC AACATACGAAGCGCCA  
115 GCTCACAATGTAAAGC CTGGGGTGGGTTTGCC  
116 TTCGCCATTGCCGGAA ACCAGGCATTAATCA  
117 GCTTCTGGTCAGGCTG CGCAACTGTGTTATCC  
118 GTTAAAATTTTAACCA ATAGGAACCCGGCACC  
119 AGACAGTCATTCAAAA GGGTGAGAAGCTATAT  
120 AGGTAAAGAAATCACC ATCAATATAATATTTT  
121 TTTCATTTGGTCAATA ACCTGTTTATATCGCG  
122 TCGCAAATGGGGCGCG AGCTGAAATAATGTGT  
123 TTTTAATTGCCCGAAA GACTTCAAACACTAT  
124 AAGAGGAACGAGCTTC AAAGCGAAGATACATT  
125 GGAATTACTCGTTTAC CAGACGACAAAAGATT  
126 GAATAAGGACGTAACA AAGCTGCTCTAAAACA  
127 CCAAATCACTTGCCCT GACGAGAACGCCAAAA  
128 CTCATCTTGAGGCAA AGAATACAGTGAATTT  
129 AAACGAAATGACCCCC AGCGATTATTCATTAC  
130 CTTAAACATCAGCTTG CTTTCGAGCGTAACAC  
131 TCGGTTTAGCTTGATA CCGATAGTCCAACCTA  
132 TGAGTTTCGTCACCAG TACAACTTAATTGTA

133 CCCCATTAGAGCTT GACGGGAAATCAAAA  
134 GAATAGCCGCAAGCGG TCCACGCTCCTAATGA  
135 GAGTTGCACGAGATAG GGTTGAGTAAGGGAGC  
136 GTGAGCTAGTTTCCTG TGTGAAATTTGGGAAG  
137 TCATAGCTACTCACAT TAATTGCGCCCTGAGA  
138 GGCGATCGCACTCCAG CCAGCTTTGCCATCAA  
139 GAAGATCGGTGCGGGC CTCTTCGCAATCATGG  
140 AAATAATTTTAAATTG TAAACGTTGATATTCA  
141 GCAAATATCGCGTCTG GCCTTCCTGGCCTCAG  
142 ACCGTTCTAAATGCAA TGCCTGAGAGGTGGCA  
143 TATATTTTAGCTGATA AATTAATGTTGTATAA  
144 TCAATTCTTTTAGTTT GACCATTACCAGACCG  
145 CGAGTAGAACTAATAG TAGTAGCAAACCCTCA  
146 GAAGCAAAAAGCGGA TTGCATCAGATAAAAA  
147 TCAGAAGCCTCCAACA GGTCAGGATCTGCGAA  
148 CAAAATATAATGCAG ATACATAAACACCAGA  
149 CATTCAACGCGAGAGG CTTTTCATATTATAG  
150 ACGAGTAGTGACAAGA ACCGGATATACCAAGC  
151 AGTAATCTTAAATTGG GCTTGAGAGAATACCA  
152 GCGAAACATGCCACTA CGAAGGCATGCGCCGA  
153 ATACGTAAAAGTACAA CGGAGATTCATCAAG  
154 CAATGACACTCCAAAA GGAGCCTTACAACGCC  
155 AAAAAAGGACAACCAT CGCCCACGCGGGTAAA  
156 TGTAGCATTCCACAGA CAGCCCTCATCTCCAA  
157 GTAAAGCACTAAATCG GAACCCTAGTTGTTCC  
158 AGTTTGGAGCCCTTCA CCGCCTGGTTGCGCTC  
159 AGCTGATTACAAGAGT CCACTATTGAGGTGCC  
160 ACTGCCCGCCGAGCTC GAATTCGTTATTACGC  
161 CCCGGTACTTTCCAG TCGGAAACGGGCAAC  
162 CAGCTGGCGGACGACG ACAGTATCGTAGCCAG

163 GTTTGAGGGAAAGGGG GATGTGCTAGAGGATC  
164 CTTTCATCCCCAAAAA CAGGAAGACCGGAGAG  
165 AGAAAAGCAACATTAA ATGTGAGCATCTGCCA  
166 GGTAGCTAGGATAAAA ATTTTGTAGTTAACATC  
167 CAACGCAATTTTGTAG AGATCTACTGATAATC  
168 CAATAAATACAGTTGA TTCCAATTTAGAGAG  
169 TCCATATACATACAGG CAAGGCAACTTTATTT  
170 TACCTTTAAGGTCTTT ACCCTGACAAAGAAGT  
171 CAAAATCATTGCTCC TTTTGATAAGTTTCAT  
172 TTTGCCAGATCAGTTG AGATTTAGTGGTTTAA  
173 AAAGATTCAGGGGGTA ATAGTAAACCATAAAT  
174 TTTCAACTATAGGCTG GCTGACCTTGTATCAT  
175 CCAGGCGCTTAATCAT TGTGAATTACAGGTAG  
176 CGCCTGATGGAAGTTT CCATTAAACATAACCG  
177 TTTCATGAAAATTGTG TCGAAATCTGTACAGA  
178 ATATATTCTTTTTTCA CGTTGAAAATAGTTAG  
179 AATAATAAGGTCGCTG AGGCTTGCAAAGACTT  
180 CGTAACGATCTAAAGT TTTGTCGTGAATTGCG  
181 ACCCAAATCAAGTTTT TTGGGGTCAAAGAACG  
182 TGGACTCCCTTTTCAC CAGTGAGACCTGTCGT  
183 TGGTTTTTAACGTCAA AGGGCGAAGAACCATC  
184 GCCAGCTGCCTGCAGG TCGACTCTGCAAGGCG  
185 CTTGCATGCATTAATG AATCGGCCCGCCAGGG  
186 ATTAAGTTCGCATCGT AACCGTGCGAGTAACA  
187 TAGATGGGGGGTAACG CCAGGGTTGTGCCAAG  
188 ACCCGTCGTCATATGT ACCCCGGTAAAGGCTA  
189 CATGTCAAGATTCTCC GTGGGAACCGTTGGTG  
190 TCAGGTCACTTTTGCG GGAGAAGCAGAATTAG  
191 CTGTAATATTGCCTGA GAGTCTGGAAAACCTAG  
192 CAAAATTAAGTACGG TGTCTGGAAGAGGTCA

193 TGCAACTAAGCAATAA AGCCTCAGTTATGACC  
194 TTTTGGCGCAGAAAAC GAGAATGAATGTTTAG  
195 AAACAGTTGATGGCTT AGAGCTTATTAAATA  
196 ACTGGATAACGGAACA ACATTATTACCTTATG  
197 ACGAACTAGCGTCCAA TACTGCGGAATGCTTT  
198 CGATTTTAGAGGACAG ATGAACGGCGCGACCT  
199 CTTTGAAAAGAACTGG CTCATTATTTAATAAA  
200 GCTCCATGAGAGGCTT TGAGGACTAGGGAGTT  
201 ACGGCTACTTACTTAG CCGGAACGCTGACCAA  
202 AAAGGCCGAAAGGAAC AACTAAAGCTTCCAG  
203 GAGAATAGCTTTTGGC GGATCGTCGGGTAGCA  
204 ACGTTAGTAAATGAAT TTTCTGTAAGCGGAGT  
205 TTTT CGATGGCC CACTACGTAAACCGTC  
206 TATCAGGG TTTT CGGTTTGC GTATTGGGAACGCGCG  
207 GGGAGAGG TTTT TGTA AAC GACGGCCATTCCCAGT  
208 CACGACGT TTTT GTAATGGG ATAGGTCAAACGGCG  
209 GATTGACC TTTT GATGAACG GTAATCGTAGCAAACA  
210 AGAGAATC TTTT GGTTGTAC CAAAAACAAGCATAAA  
211 GCTAAATC TTTT CTGTAGCT CAACATGTATTGCTGA  
212 ATATAATG TTTT CATTGAAT CCCCTCAAATCGTCA  
213 TAAATATT TTTT GGAAGAAA AATCTACGACCAGTCA  
214 GGACGTTG TTTT TCATAAGG GAACCGAAAGGCGCAG  
215 ACGGTCAA TTTT GACAGCAT CGGAACGAACCCTCAG  
216 CAGCGAAAA TTTT ACTTTCA ACAGTTT CTGGGA TTTTGCT AAACTTTT  
Loop1 AACATCACTTGCCTGAGTAGAAGAACT  
Loop2 TGTAGCAATACTTCTTTGATTAGTAAT  
Loop3 AGTCTGTCCATCACGCAAATTAACCGT  
Loop4 ATAATCAGTGAGGCCACCGAGTAAAAG  
Loop5 ACGCCAGAATCCTGAGAAGTGTTTTT  
Loop6 TTAAAGGGATTTTAGACAGGAACGGT

Loop7 AGAGCGGGAGCTAAACAGGAGGCCGA

Loop8 TATAACGTGCTTTCCTCGTTAGAATC

Loop9 GTECTATGGTTGCTTTGACGAGCACG

Loop10 GCGCTTAATGCGCCGCTACAGGGCGC

**For AuNR dimer1**

136 AAAAAAAAAAAAAAAAAA AATGA GTGAGCTAGTTTCCTG TGTGAAATTTGGGAAG

134 GAATAGCCGCAAGCGG TCCACGCTCCT

117 AAAAAAAAAAAAAAAAAA GCACC GCTTCTGGTCAGGCTG CGCAACTGTGTTATCC

118 GTTAAAATTTTAACCA ATAGGAACCCG

114 AAAAAAAAAAAAAAAAAA CGGAA GCATAAAGTCCACAC AACATACGAAGCGCCA

112 CCGAAATCCGAAAATC CTGTTTGAAGC

20 AAAAAAAAAAAAAAAAAA AGTAC CTTTTACACAGATGAA TATACAGTAAACAATT

18 TTAAGACGTTGAAAAC ATAGCGATAAC

23 AAAAAAAAAAAAAAAAAA TTTGA GGATTTAGCGTATTAA ATCCTTTGTTTTTCAGG

26 TAGCCCTACCAGCAGA AGATAAAAACA

45 AAAAAAAAAAAAAAAAAA ATTCG CCTGATTGAAAGAAAT TGCGTAGACCCGAACG

43 ATCAAATCGTCGCTA TTAATTAACGG

71 AAAAAAAAAAAAAAAAAA TTATC ATTTTGCCTTTTAGG AGCACTAAGCAACAGT

69 GCGCAGAGATATCAAA ATTATTTGACA

176 ATA AGC TAT CGA ATC CGCCTGATGGAAGTTT CCATTAACATAACCG

168 ATA AGC TAT CGA ATC CAATAAATACAGTTGA TTCCCAATTTAGAGAG

164 ATA AGC TAT CGA ATC CTTTCATCCCCAAAAA CAGGAAGACCGGAGAG

155 ATA AGC TAT CGA ATC AAAAAAGGACAACCAT CGCCCACGCGGGTAAA

151 ATA AGC TAT CGA ATC AGTAATCTTAAATTGG GCTTGAGAGAATACCA

147 ATA AGC TAT CGA ATC TCAGAAGCCTCCAACA GGTCAGGATCTGCGAA

143 ATA AGC TAT CGA ATC TATATTTTAGCTGATA AATTAATGTTGTATAA

**For AuNR dimer2**

136 AAAAAAAAAAAAAAAAAA AATGA GTGAGCTAGTTTCCTG TGTGAAATTTGGGAAG

134 GAATAGCCGCAAGCGG TCCACGCTCCT

117 AAAAAAAAAAAAAAAAAA GCACC GCTTCTGGTCAGGCTG CGCAACTGTGTTATCC  
118 GTTAAAATTTTAACCA ATAGGAACCCG  
114 AAAAAAAAAAAAAAAAAA CGGAA GCATAAAGTTCCACAC AACATACGAAGCGCCA  
112 CCGAAATCCGAAAATC CTGTTTGAAGC  
20 AAAAAAAAAAAAAAAAAA AGTAC CTTTACACAGATGAA TATACAGTAAACAATT  
18 TTAAGACGTTGAAAAC ATAGCGATAAC  
23 AAAAAAAAAAAAAAAAAA TTTGA GGATTTAGCGTATTAA ATCCTTTGTTTTTCAGG  
26 TAGCCCTACCAGCAGA AGATAAAAACA  
45 AAAAAAAAAAAAAAAAAA ATTCG CCTGATTGAAAGAAAT TCGTAGACCCGAACG  
43 ATCAAATCGTCGCTA TTAATTAACGG  
71 AAAAAAAAAAAAAAAAAA TTATC ATTTTGCCTTTTAGG AGCACTAAGCAACAGT  
69 GCGCAGAGATATCAAA ATTATTTGACA  
53 TCGGCCTAGTACACA CCTCAAGAATACATGG CTTTGTAGTAGAACCAC  
57 TCGGCCTAGTACACA AATCACCAAATAGAAA ATTCATATATAACGGA  
61 TCGGCCTAGTACACA TTTTGTTTAAGCCTTA AATCAAGAATCGAGAA  
65 TCGGCCTAGTACACA CATATTTAGAAATACC GACCGTGTTACCTTTT  
58 TCGGCCTAGTACACA TCACAATCGTAGCACC ATTACCATCGTTTTCA  
62 TCGGCCTAGTACACA AGGTTTTGAACGTCAA AAATGAAAGCGCTAAT  
66 TCGGCCTAGTACACA AATGGTTTACAACGCC AACATGTAGTTCAGCT

**For AuNR trimer1 and trimer2**

136 AAAAAAAAAAAAAAAAAA AATGA GTGAGCTAGTTTCCTG TGTGAAATTTGGGAAG  
134 GAATAGCCGCAAGCGG TCCACGCTCCT  
117 AAAAAAAAAAAAAAAAAA GCACC GCTTCTGGTCAGGCTG CGCAACTGTGTTATCC  
118 GTTAAAATTTTAACCA ATAGGAACCCG  
114 AAAAAAAAAAAAAAAAAA CGGAA GCATAAAGTTCCACAC AACATACGAAGCGCCA  
112 CCGAAATCCGAAAATC CTGTTTGAAGC  
20 AAAAAAAAAAAAAAAAAA AGTAC CTTTACACAGATGAA TATACAGTAAACAATT  
18 TTAAGACGTTGAAAAC ATAGCGATAAC  
23 AAAAAAAAAAAAAAAAAA TTTGA GGATTTAGCGTATTAA ATCCTTTGTTTTTCAGG  
26 TAGCCCTACCAGCAGA AGATAAAAACA

45 AAAAAAAAAAAAAAAAAA ATTCG CCTGATTGAAAGAAAT TGC GTAGACCCGAACG  
43 ATCAAATCGTCGCTA TTAATTAACGG  
71 AAAAAAAAAAAAAAAAAA TTATC ATTTTGC GTCTTTAGG AGCACTAAGCAACAGT  
69 GCGCAGAGATATCAAA ATTATTTGACA  
176 ATA AGC TAT CGA ATC CGCCTGATGGAAGTTT CCATTAACATAACCG  
168 ATA AGC TAT CGA ATC CAATAAATACAGTTGA TTCCCAATTTAGAGAG  
164 ATA AGC TAT CGA ATC CTTTCATCCCCAAAAA CAGGAAGACCGGAGAG  
155 ATA AGC TAT CGA ATC AAAAAAGGACAACCAT CGCCCACGCGGGTAAA  
151 ATA AGC TAT CGA ATC AGTAATCTTAAATTGG GCTTGAGAGAATACCA  
147 ATA AGC TAT CGA ATC TCAGAAGCCTCCAACA GGTCAGGATCTGCGAA  
143 ATA AGC TAT CGA ATC TATATTTTAGCTGATA AATTAATGTTGTATAA  
53 TCGGCCTAGTACACA CCTCAAGAATACATGG CTTTTGATAGAACCAC  
57 TCGGCCTAGTACACA AATCACCAAATAGAAA ATTCATATATAACGGA  
61 TCGGCCTAGTACACA TTTTGT TTAAGCCTTA AATCAAGAATCGAGAA  
65 TCGGCCTAGTACACA CATATTTAGAAATACC GACCGTGTTACCTTTT  
58 TCGGCCTAGTACACA TCACAATCGTAGCACC ATTACCATCGTTTTCA  
62 TCGGCCTAGTACACA AGGTTTTGAACGTCAA AAATGAAAGCGCTAAT  
66 TCGGCCTAGTACACA AATGGTTTACAACGCC AACATGTAGTTCAGCT

**The sequences of thiolated sticky ends used for modification of AuNRs localized respectively on opposites sides of DNA origami (left to right 5'-3')**

ssDNA1: TTTTTTTTTTTTTTTT AGCGA-SH

ssDNA2: GATTCGATAGCTTAT GCTGC-SH

ssDNA3: TGTGTACTAGGCCGA TGCGA-SH

## References

- (1) X. Lan, Z. Chen, G. Dai, X. Lu, W. Ni, Q. Wang, *J. Am. Chem. Soc.*, 2013, **135**, 11441.
- (2) X. Ye, L. Jin, H. Caglayan, J. Chen, G. Xing, C. Zheng, V. Doan-Nguyen, Y. Kang, N. Engheta, C. Kagan, C. Murray, *ACS Nano*, 2012, **6**, 2804.
